# Supplementary material for: Spatial Distribution of Sand Fly Vectors and Eco-Epidemiology of Cutaneous Leishmaniasis Transmission in Colombia
Source: PubMed Central journal article supplement (PMC4592259; doi:10.1371/journal.pone.0139391), 2015-10-02

**S1 Fig. Spatial distribution of sandfly species of medical importance by genus.** The Andean Mountains are shown a) *Pintomyia* b) *Psychodopygus* c) *Lutzomyia* d) *Nyssomyia* e) *Bichromomyia* and *Psathyromyia* genus.

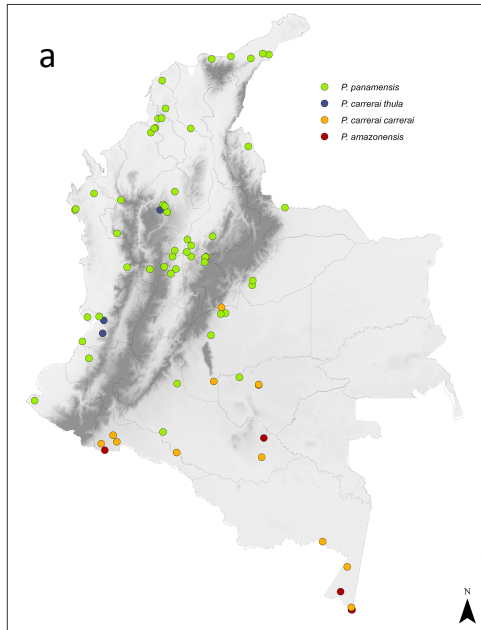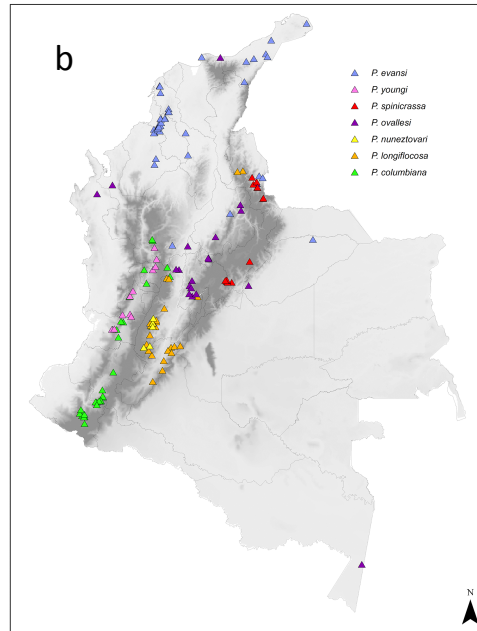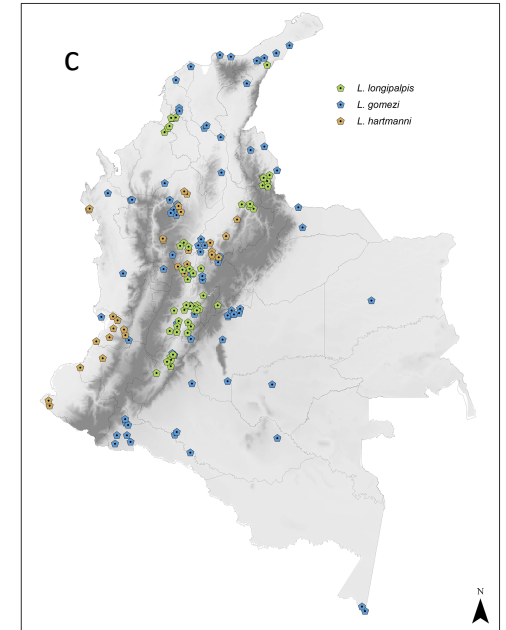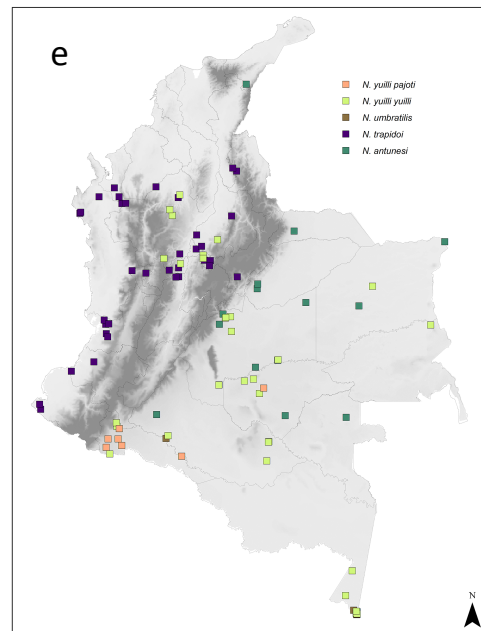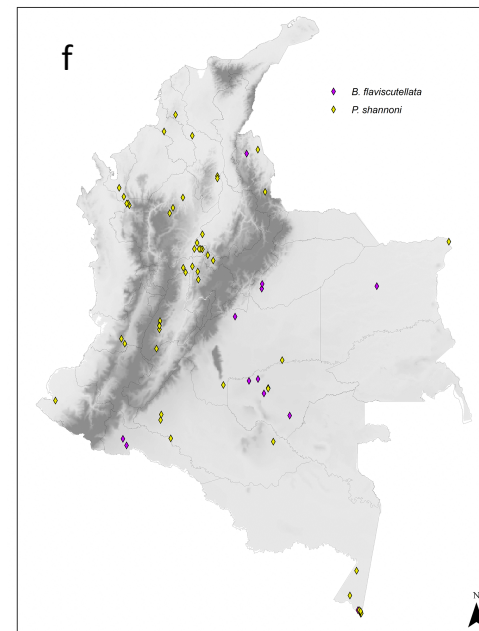

Supplement: pone.0139391.s001.pdf [file pone.0139391.s001.pdf]
