# Supplementary material for: Spatial Distribution of Sand Fly Vectors and Eco-Epidemiology of Cutaneous Leishmaniasis Transmission in Colombia
Source: PubMed Central journal article supplement (PMC4592259; doi:10.1371/journal.pone.0139391), 2015-10-02
Supplement: pone.0139391.s003.pdf [file pone.0139391.s003.pdf]

**S2 Table.** Percent of area covered by potential distribution of each sand fly species in areas of cutaneous leishmaniasis by prevalence.

| Species / Prevalence | <i>P. shannoni</i> (%) | <i>P. panamensis</i> (%) | <i>P. ovallesi</i> (%) | <i>P. nuneztovari</i> (%) | <i>P. longiflocosa</i> (%) | <i>P. columbiana</i> (%) | <i>P. amazonensis</i> (%) | <i>N. yuilli pajoti</i> (%) | <i>N. umbratilis</i> (%) | <i>N. trapedoi</i> (%) | <i>L. antunesi</i> (%) | <i>L. longipalpis</i> (%) | <i>L. hartmanni</i> (%) | <i>L. gomezi</i> (%) | <i>L. evansi</i> (%) | <i>P. youngi</i> (%) | <i>P. spinicrassa</i> (%) |
|----------------------|------------------------|--------------------------|------------------------|---------------------------|----------------------------|--------------------------|---------------------------|-----------------------------|--------------------------|------------------------|------------------------|---------------------------|-------------------------|----------------------|----------------------|----------------------|---------------------------|
| 0.33 to 101.35       | 38.06                  | 45.22                    | 49.84                  | 46.69                     | 49.38                      | 54.20                    | 35.64                     | 36.67                       | 37.73                    | 39.98                  | 27.02                  | 54.65                     | 44.46                   | 44.90                | 68.56                | 50.85                | 45.91                     |
| 102.53 to 405.26     | 22.77                  | 18.85                    | 13.43                  | 10.31                     | 12.71                      | 8.77                     | 19.58                     | 18.54                       | 16.00                    | 17.53                  | 37.42                  | 11.13                     | 14.81                   | 16.00                | 5.05                 | 5.97                 | 8.05                      |
| 423.86 to 1071.31    | 11.81                  | 9.74                     | 9.92                   | 5.04                      | 3.75                       | 3.53                     | 12.06                     | 12.25                       | 13.37                    | 20.61                  | 13.70                  | 7.29                      | 16.45                   | 8.86                 | 3.00                 | 3.14                 | 2.96                      |
| 1071.31 to 2275.56   | 2.02                   | 2.16                     | 3.54                   | 2.89                      | 4.36                       | 1.25                     | 0.89                      | 0.75                        | 1.10                     | 4.19                   | 0.82                   | 2.34                      | 3.35                    | 2.40                 | 0.01                 | 0.86                 | 0.64                      |
| 2275.56 to 3643.82   | 2.78                   | 2.87                     | 1.12                   | 1.09                      | 1.80                       | 1.37                     | 3.40                      | 3.36                        | 2.87                     | 1.76                   | 5.25                   | 0.06                      | 1.93                    | 3.32                 | 0.00                 | 0.54                 | 0.00                      |
| No Data              | 22.56                  | 21.15                    | 22.16                  | 33.98                     | 28.00                      | 30.88                    | 28.43                     | 28.44                       | 28.93                    | 15.92                  | 15.79                  | 24.53                     | 19.00                   | 24.53                | 23.39                | 38.64                | 42.44                     |
